# Supplementary material for: Apoptosis-independent organoruthenium anticancer complexes that overcome multidrug resistance: self-assembly and phenotypic screening strategies
Source: PubMed Central journal article supplement — Chem Sci. 2017 Feb 28;8(5):3641–9. doi: 10.1039/c7sc00497d (PMC6094174; doi:10.1039/c7sc00497d), 2017-02-28
Supplement: SC-008-C7SC00497D-s001.pdf [file SC-008-C7SC00497D-s001.pdf]

## Supplementary Information for

# Apoptosis-Independent Organoruthenium Anticancer Complexes that Overcome Multidrug Resistance: Self-Assembly and Phenotypic Screening Strategies

*Mun Juinn Chow*<sup>\*1</sup>, *Mohammad Alfiean*<sup>2</sup>, *Giorgia Pastorin*<sup>3,4</sup>, *Christian Gaiddon*<sup>5,6</sup> and *Wee Han Ang*<sup>\*1,4</sup>

<sup>1</sup>Department of Chemistry, National University of Singapore, 3 Science Drive 3, 117543 Singapore

<sup>2</sup>School of Chemistry and Life Sciences, Nanyang Polytechnic, Singapore

<sup>3</sup>Department of Pharmacy, National University of Singapore, 3 Science Drive 3, 117543 Singapore

<sup>4</sup>NUS Graduate School for Integrative Sciences and Engineering, Singapore

<sup>5</sup>Université de Strasbourg, Strasbourg, France

<sup>6</sup>U1113 INSERM, 3 Avenue Molière, Strasbourg 67200, France

\*corresponding authors

## EXPERIMENTAL

**Materials.** All experimental procedures were carried out without additional precautions to exclude air or moisture unless otherwise specified. All chemicals and solvents were used as received.  $\text{RuCl}_3 \cdot x\text{H}_2\text{O}$  was purchased from both Precious Metals Online.  $[(\eta^6\text{-hexamethylbenzene})\text{RuCl}_2]_2$  and  $[(\eta^6\text{-1,3,5-triisopropylbenzene})\text{RuCl}_2]_2$  were synthesized according to previously reported protocols.<sup>1</sup> Thiazolyl blue tetrazolium bromide (MTT), IGEPAL CA-630, DL-Dithiothreitol, Tetramethylethylenediamine (TEMED), Sodium Deoxycholate, Non-fat Dried Milk Bovine, Bovine Serum Albumin, TWEEN® 20 and Ponceau S were purchased from Sigma-Aldrich. Tris was purchased from Vivantis Technologies. Gibco® MEM Non-Essential Amino Acids solution (NEAA) and 10% SDS solution were purchased from Life Technologies. Glycine, Hyclone™ Trypsin Protease 2.5% (10X) solution, RPMI 1640, DMEM medium, Fetal bovine serum (FBS) and Pierce™ Protease and Phosphatase Inhibitor Mini Tablets were purchased from Thermo Fisher Scientific. Hyclone™ Dulbecco's Phosphate-Buffered Saline (10x) and Penicillin-Streptomycin (10 000 U/mL) were purchased from Ge Healthcare Life Sciences. Bio-rad Protein Assay Dye Reagent Concentrate, 30% Acrylamide/Bis solution, 4x Laemmli Sample Buffer, Nitrocellulose Membrane, 0.2  $\mu\text{m}$  and 0.45  $\mu\text{m}$  were purchased from Bio-rad Laboratories. Luminata™ Classico, Crescendo and Forte Western HRP Substrate were purchased from Merck Millipore Corporation. Pan Caspase Inhibitor z-VAD-fmk was purchased from R&D Systems™. All other chemicals used were purchased from Sigma-Aldrich (Singapore).

**General instrumentation.**  $^1\text{H}$  NMR spectrums were obtained using a Bruker Avance 300 spectrometer and the chemical shifts ( $\delta$ ) were reported in parts per million with reference to residual solvent peaks. Electrospray-ionization Mass Spectrometry (ESI-MS) spectra were obtained using Thermo Finnigan MAT ESI-MS System. UV-vis spectra were obtained using the Shimadzu UV-1800 UV Spectrophotometer. Ru concentrations were determined using the Optima ICP-OES (Perkin-Elmer) operated by CMMAC, NUS. Elemental analyses of selected Ru complexes were carried out using a Perkin-Elmer PE 2400 elemental analyzer by CMMAS, NUS. Absorbance on 96-well plates were measured using BioTek® Synergy H1 Hybrid Reader. Western blot proteins bands were visualized *via* enhanced chemiluminescence imaging (PXi, Syngene). Ultrapure water was purified by a Milli-Q UV purification system (Sartorius Stedim Biotech SA).

**HPLC analysis of compound purity (assembly yield).** Determination of the purity (assembly yield) of 195 RAS complexes was done using analytical HPLC on a Shimadzu Prominence System equipped with a DGU-20A<sub>3</sub> Degasser, two LC-20AD Liquid Chromatography Pump, a SPD-20A UV/Vis Detector and a Shim Pack GVP-ODS 2.0 mm 18 column (5  $\mu\text{M}$ , 120Å, 250 mm

x 4.60 mm i.d.) with detection at both 214 nm and 254 nm. The gradient elution conditions were as follows: 20-80% solvent B over 30 min, where solvent A is 10 mM aqueous NH<sub>4</sub>OAc pH 7.0 and solvent B is CH<sub>3</sub>CN.

**C3A Plate Synthesis of RAS complexes.** Separate stock solutions containing RAx (10 mM), PAy (40 mM) and ADz (40 mM) were prepared in DMSO. The reactions were then carried out on a Microlon® 200 96-well flat-bottom plate (Greiner Bio-One) with RAx (50 µL), PAy (25 µL) and ADz (25 µL) and ddH<sub>2</sub>O (100 µL) added to each well in one portion, yielding RAS complexes (5 mM) in 1:1 v/v DMSO/H<sub>2</sub>O (200 µL). The plates were sealed and incubated with shaking at rt for 36 h. This procedure was repeated until all combinations of the three components were achieved. Subsequently, The 195 reaction mixtures were analysed by ESI-MS and RP-HPLC without further work-up or purification.

**Cell lines and tissue culture.** The human colorectal carcinoma HCT116 and HCT116 p53<sup>-/-</sup> cell line pair were gifts from Professor Shen Han-ming (NUS). TC7 cells were cloned from parental colorectal adenocarcinoma Caco-2 cells by the limited dilution technique.<sup>2</sup> Human gastric adenocarcinoma AGS cells, were acquired from ATCC® (Manassa,VA). HCT116 and HCT116 p53<sup>-/-</sup> cells were cultured in DMEM medium containing 10% FBS and 1% Penicillin/Streptomycin. TC7 cells were cultured in DMEM medium containing 20% FBS, 1% Penicillin/Streptomycin and 1% NEAA. AGS cells were cultured in RPMI 1640 medium containing 10% FBS and 1% Penicillin/Streptomycin. All cell lines were grown at 37 °C in a humidified atmosphere of 95% air and 5% CO<sub>2</sub>. Experiments were performed on cells within 20 passages.

**Inhibition of Cell Viability (Screening).** The anti-proliferation activity of the 195 RAS complexes on exponentially growing cancer cells were screened using a modified MTT assay. HCT116 cells and TC7 were seeded at 5000 cells/100 µL per well and 4000 cells/100 µL per well respectively, in Corning® Costar® 96-well plates and incubated for 24 h. Subsequently, the seeded cells were exposed to the library of RAS complexes in a predetermined order, at a single concentration of 25 µM 1% (v/v) DMSO and incubated for 48 h at 37 °C, 5% CO<sub>2</sub>. After 48 h, the medium was aspirated and replaced with MTT solution in complete DMEM media (100 µL, 0.5 mg/mL) and incubated for an additional 45 min at 37 °C, 5% CO<sub>2</sub>. Subsequently, the medium was aspirated, and the purple formazan crystals dissolved in DMSO (100 µL). The absorbance due to the dissolved purple formazan was than obtained at 570 nm. The cell viabilities associated with each RAS complex were calculated from the measured absorbance of three replicate, with reference to untreated controls.

**Synthesis of 532m and 532p.** The bulk synthesis of **532m** and **532p** was done in one-pot manner similar to the plate synthesis, except that final volume of the reaction mixture was scaled

up from 200  $\mu$ L to 20 mL. The DMSO/H<sub>2</sub>O solvent mixture was then lyophilized over 48 h. The resulting brown viscous liquid was reconstituted in minimal amount of chloroform and purified by silica gel column chromatography (Gradient elution: 1:4 v/v EtOH/CHCl<sub>3</sub>, R<sub>f</sub> = 0.5; 1:3 v/v EtOH/CHCl<sub>3</sub>, R<sub>f</sub> = 0.7). The final product was then dried *in vacuo* for 1 h to give a deep red solid. The products were determined to be > 95% pure by elemental analysis.

**532m.** Yield: 41 mg (64%). <sup>1</sup>H NMR (300 MHz, DMSO-d<sub>6</sub>):  $\delta$  9.34 (s, 1H, py), 8.85 (s, 1H, -CH=N-), 8.17 (m, 2H, py+aryl), 8.05 (m, 2H, py+aryl), 7.90 (m, 2H, py+aryl), 5.92 (s, 3H, C<sub>6</sub>H<sub>3</sub>), 2.61 (s, 3H, py-CH<sub>3</sub>), 2.40 (sept, *J* = 7.0 Hz, 3H, CHMe<sub>2</sub>), 1.14 (d, *J* = 7.0 Hz, 9H, C(CH<sub>3</sub>)<sub>2</sub>), 0.98 (d, *J* = 7.0 Hz, 9H, C(CH<sub>3</sub>)<sub>2</sub>) ppm. <sup>13</sup>C NMR (500 MHz, DMSO-d<sub>6</sub>):  $\delta$  171.0, 155.4, 151.6, 151.3, 140.8, 140.1, 130.8, 129.9, 129.6, 126.7, 125.6, 124.7, 122.5, 119.0, 109.1, 80.7, 30.1, 23.4, 20.3, 18.4 ppm. <sup>19</sup>F NMR (400 MHz, DMSO-d<sub>6</sub>):  $\delta$  -61.3 ppm. ESI-MS (+ve mode): *m/z* = 605 [M]<sup>+</sup>. Analysis (Calcd., found for C<sub>29</sub>H<sub>35</sub>Cl<sub>2</sub>F<sub>3</sub>N<sub>2</sub>ORu•4H<sub>2</sub>O•0.2CHCl<sub>3</sub>): C (47.62, 47.47), H (5.91, 5.71) N (3.80, 3.52).

**532p.** Yield: 35.9 mg (56%). <sup>1</sup>H NMR (300 MHz, DMSO-d<sub>6</sub>):  $\delta$  9.38 (s, 1H, py), 8.91 (s, 1H, -CH=N-), 8.23 (d, *J* = 8.0 Hz, 1H, py), 8.16 (d, *J* = 8.0 Hz, 1H, py), 8.01 (d, *J* = 8.0 Hz, 2H, aryl), 7.90 (d, *J* = 8.0 Hz, 2H, aryl), 5.96 (s, 3H, C<sub>6</sub>H<sub>3</sub>), 2.62 (s, 3H, py-CH<sub>3</sub>), 2.40 (sept, *J* = 7.0 Hz, 3H, CHMe<sub>2</sub>), 1.13 (d, *J* = 7.0 Hz, 9H, C(CH<sub>3</sub>)<sub>2</sub>), 0.98 (d, *J* = 7.0 Hz, 9H, C(CH<sub>3</sub>)<sub>2</sub>) ppm. <sup>13</sup>C NMR (500 MHz, DMSO-d<sub>6</sub>):  $\delta$  170.6, 155.4, 153.9, 151.6, 140.9, 140.1, 130.0, 129.2, 129.0, 126.6, 125.0, 123.3, 122.8, 108.9, 81.0, 30.2, 23.6, 20.3, 18.4 ppm. <sup>19</sup>F NMR (400 MHz, DMSO-d<sub>6</sub>):  $\delta$  -60.9 ppm. ESI-MS (+ve mode): *m/z* = 605 [M]<sup>+</sup>. Analysis (Calcd., found for C<sub>29</sub>H<sub>35</sub>Cl<sub>2</sub>F<sub>3</sub>N<sub>2</sub>ORu•5.5H<sub>2</sub>O): C (47.09, 47.16), H (6.27, 6.10) N (3.79, 3.73).

**Inhibition of cell viability assay.** The anti-proliferation activities of **532m** and **532p** on exponentially growing cancer cells were determined using MTT assay. HCT116, HCT116 p53<sup>-/-</sup> and AGS were seeded at 5 000 cells per well (100  $\mu$ L) while TC7 cells were seeded at 4000 cells per well in Corning® Costar® 96-well plates and incubated for 24 h. Thereafter, cancer cells were exposed to drugs at different concentration in complete media for 48 h. The final concentration of DMSO in medium was < 1% (v/v) at which cell viability was not significantly inhibited. The medium was removed and replaced with MTT solution (100  $\mu$ L, 0.5 mg/mL) in media and incubated for an additional 45 min. Subsequently, the MTT-medium solution was aspirated, and the purple formazan crystals dissolved in DMSO (100  $\mu$ L). The absorbance due to the dissolved purple formazan was than obtained at 570 nm. Inhibition to cell viability was evaluated with reference to the IC<sub>50</sub> value, which is defined as the concentration needed for a 50% reduction of survival based on the survival curves. IC<sub>50</sub> values were calculated from the dose - response curves obtained in repeated experiments and adjusted to actual [Ru] administered, which was determined using ICP-OES. The experiments were performed in 3 replicates for each drug concentration and were

carried out at least three times independently. For cell viability assays involving inhibitors, z-VAD-fmk (40  $\mu$ M) was added 1 h prior to the addition of the test compounds and subsequently co-incubated for an additional 48 h. Cell viability in the absence and presence of inhibitor was normalized against the untreated control.

**Antibodies and Western blot protocol.** HCT116 cells were grown at 500 000 cells per well (2 mL) on Corning® Costar® 6-well plates for 24 h before being treated with **532m** and **532p** at 0.5x and 1x [IC<sub>50</sub>] for 24 h and 48 h. Oxaliplatin and 5-fluorouracil was used as a positive control at the same effective concentrations. The cells were lysed with RIPA lysis buffer [100  $\mu$ L, 0.1% SDS, 0.5% Sodium Deoxycholate, 1% IGEPAL® CA-630, 150 mM NaCl, 25 mM Tris-HCl (pH 8.0), protease and phosphatase inhibitor cocktail]. The cell lysates were transferred to separate 1.5 mL tubes and sonicated for 3 x 15 s. The samples were then centrifuged at 13000 rpm, 4°C for 15 min. The liquid supernatant containing the proteins were collected and total protein content of each sample was quantified *via* Bradford's assay. 50  $\mu$ g of proteins from each sample were reconstituted in loading buffer [100 mM DTT, 1x Protein Loading Dye] and heated at 95°C for 5 min. The protein mixtures were resolved on either a 10% or 12% SDS-PAGE gel by electrophoresis and transferred to a 0.2  $\mu$ m nitrocellulose membrane. Protein bands were visualized *via* enhanced chemiluminescence imaging (PXi, Syngene) after treatment with the appropriate primary and HRP-conjugated secondary antibodies. Equal loading of protein was confirmed by comparison with actin expression. The following antibodies were used: p53 (FL-393) (sc-6243) and p21 (F-5) (sc-6246) from Santa Cruz Biotechnologies. Cleaved caspase-3 (Asp175) (5A1E), cleaved caspase-7 (Asp198) (D6H1), cleaved caspase-9 (Asp330) (D2D4), Parp-1 (46D11), Cleaved Parp-1 (Asp214) (D64E10) and pH2A.X (Ser139) (20E3) from Cell Signaling Technology.  $\beta$ -Actin (ab8229) from Abcam. Pierce™ HRP-conjugated anti-rabbit IgG (H+L) (#31460), anti-mouse IgG (H+L) (#31430) and anti-goat IgG (H+L) (#31402) from Thermo Fisher Scientific. All antibodies were used at 1:1000 dilutions except for actin (1:10000), anti-mouse, anti-goat and anti-rabbit (1:5000).

## SUPPLEMENTARY FIGURES

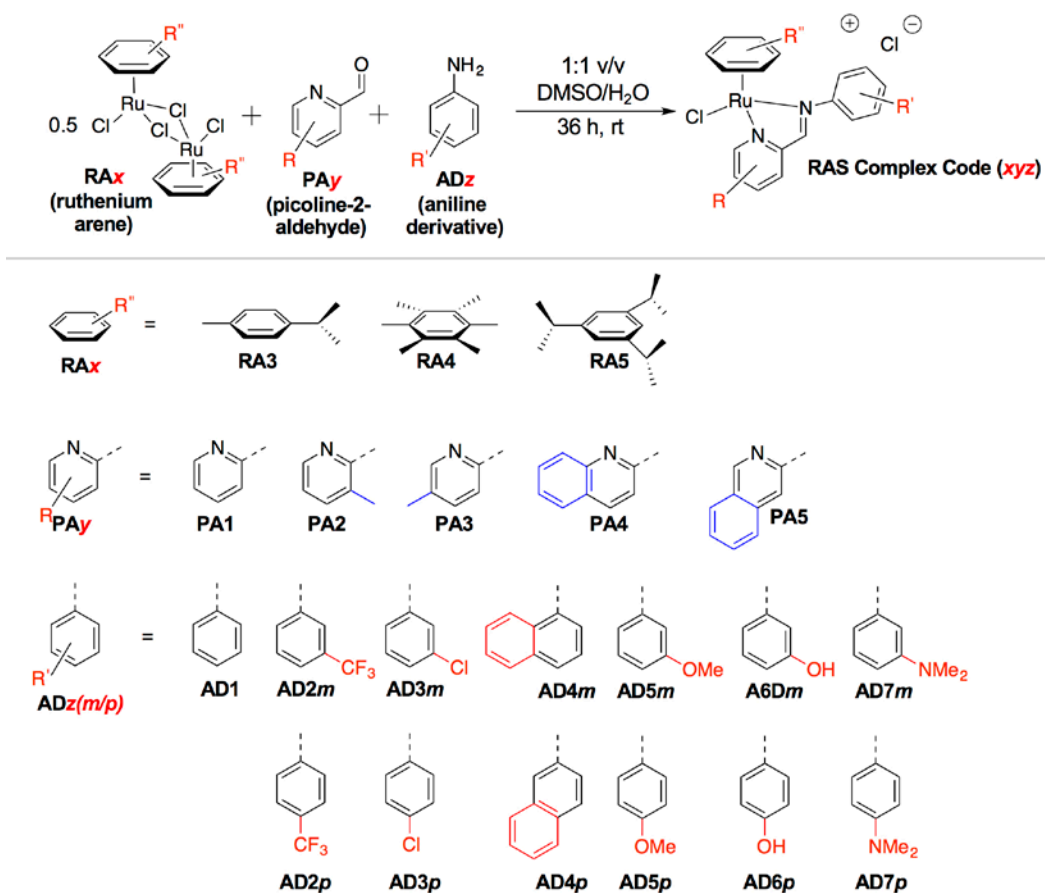

**Figure S1. Structures and naming convention for 195 RAS complexes.** RAS complexes in the subsequent figures are named according to this standardized convention.

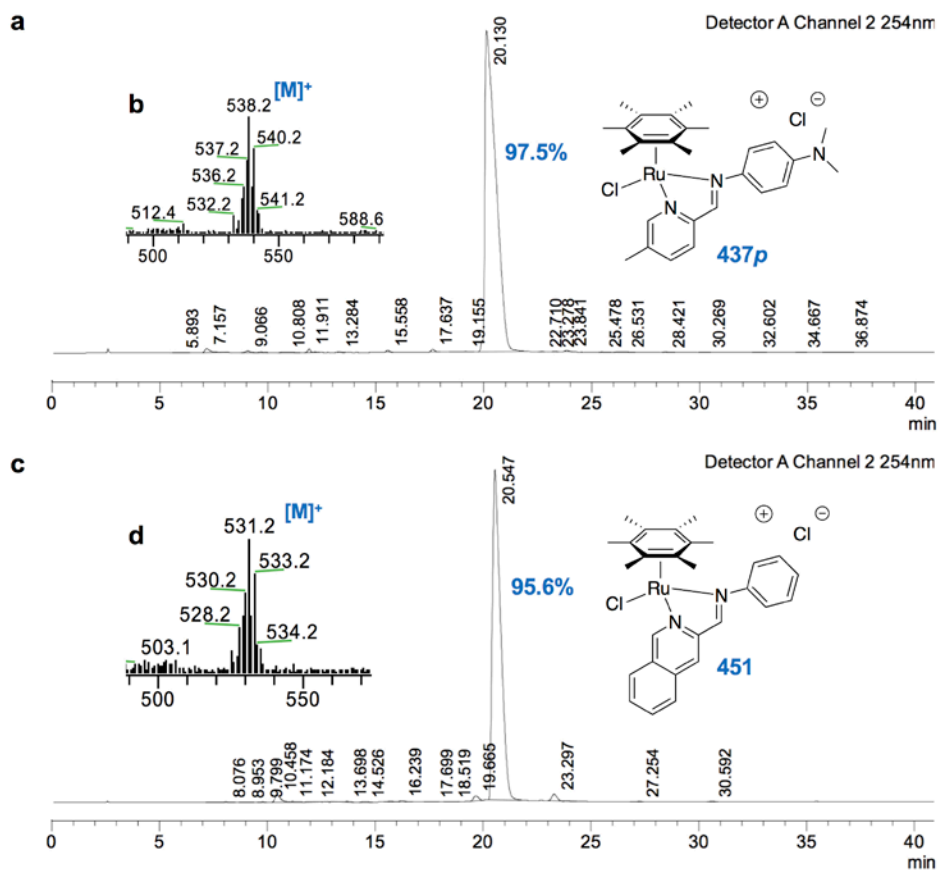

**Figure S2. Examples of ESI-MS and HPLC spectrums for assembled RAS complexes. (a) HPLC spectrum and (b) ESI-MS spectrum of **437p**. (c) HPLC Spectrum and (d) ESI-MS spectrum of **451**. Samples were analyzed immediately after C3A one-pot synthesis without further work-up or purification.**

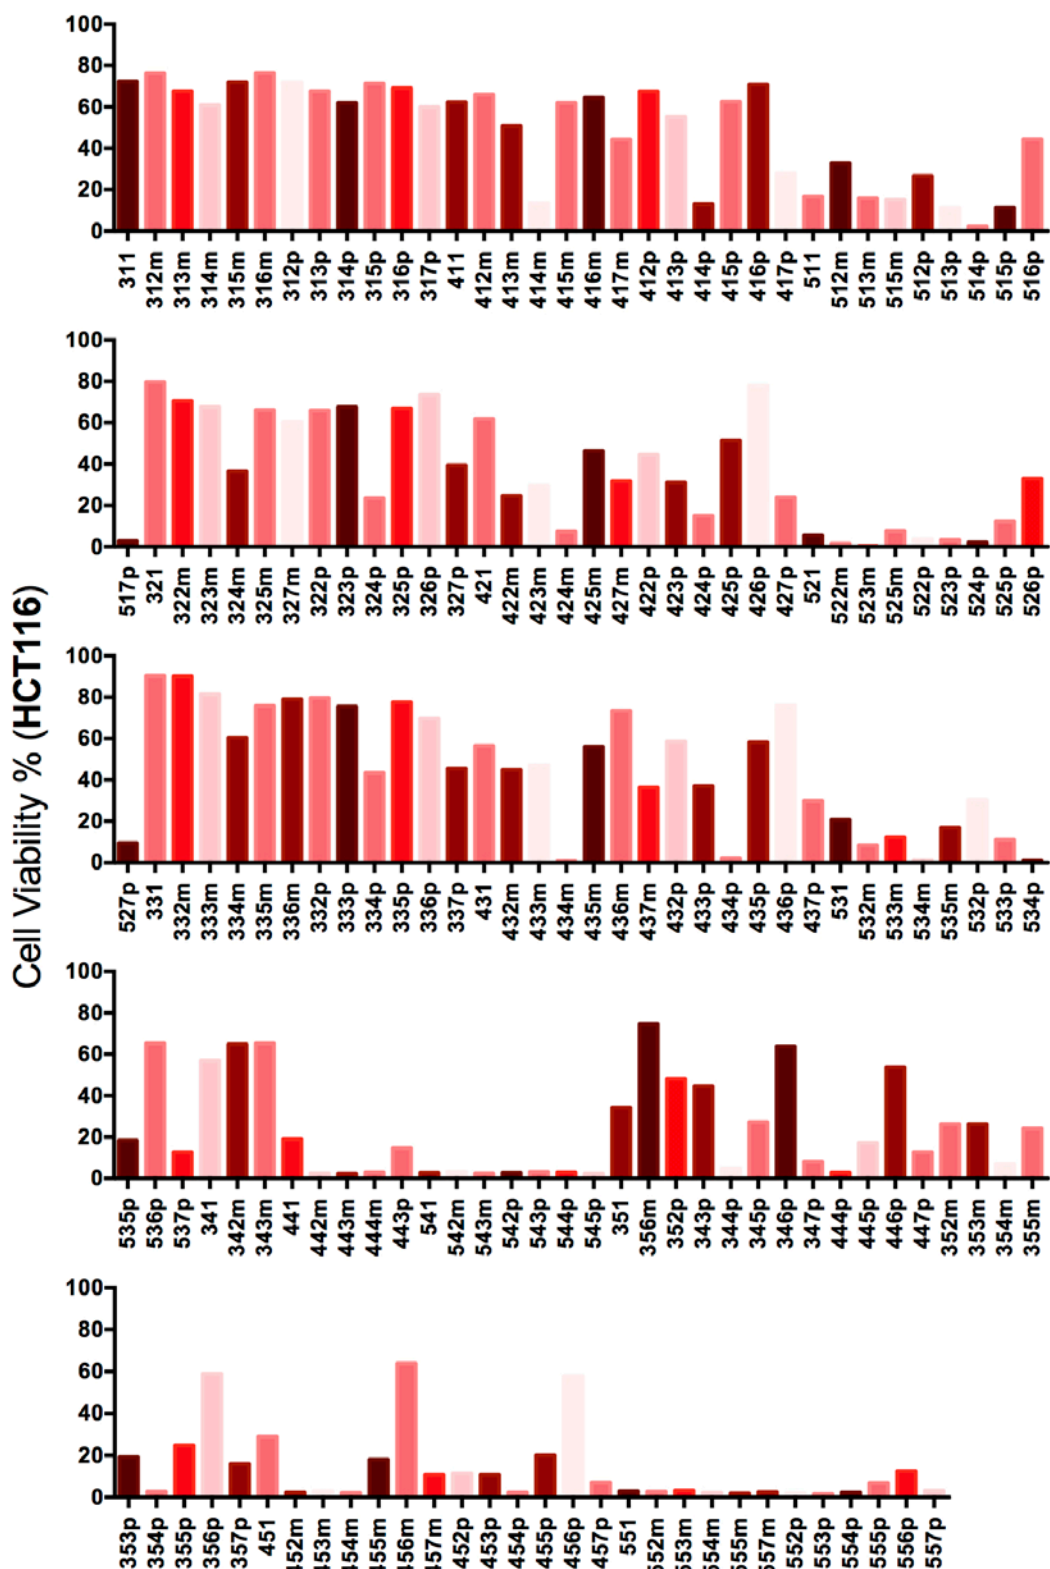

Figure S3. HCT116 cell viability %, 48h after single-concentration screen (25  $\mu$ M) with 166 RAS complexes. Only compounds with assembly yield (purity) greater than 70% were chosen for the screen.



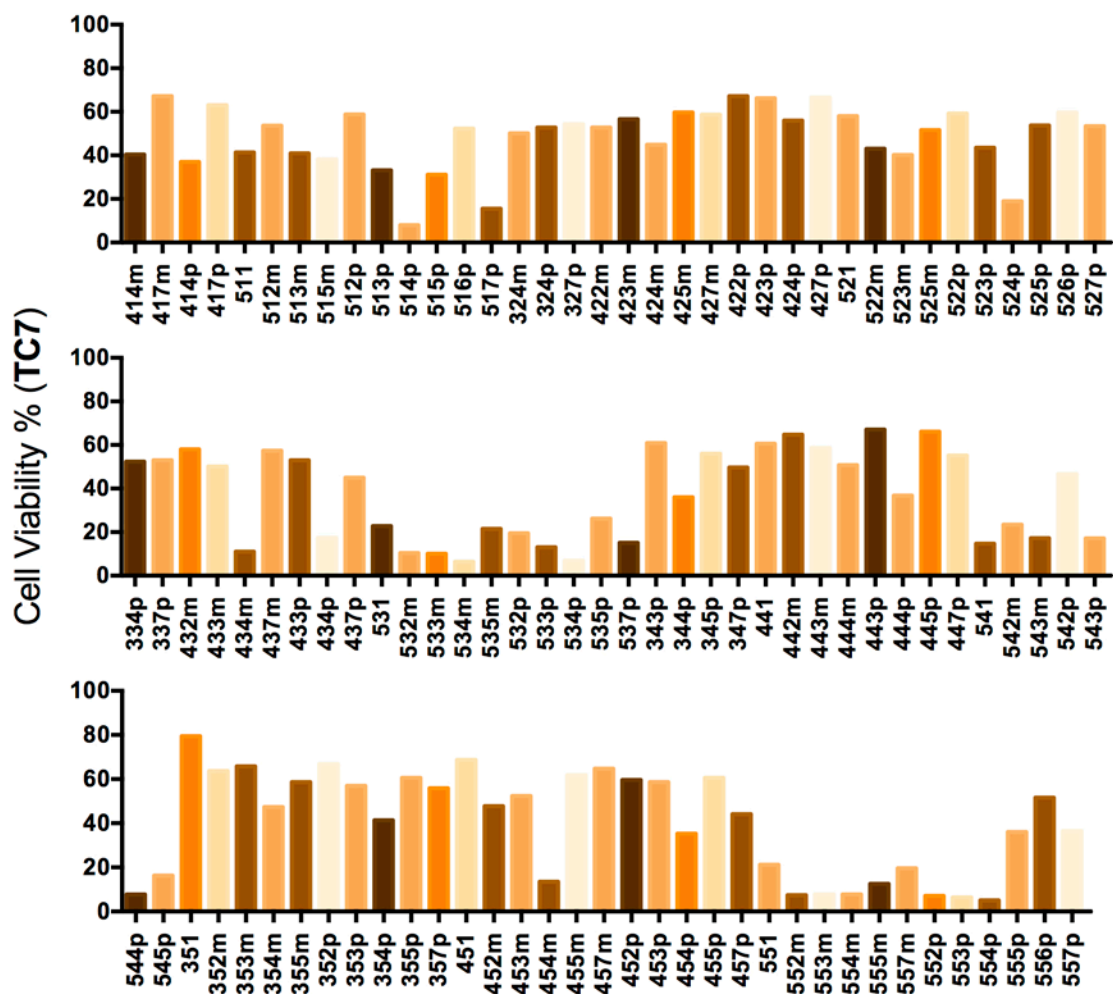

**Figure S4. TC7 cell viability %, 48h after single-concentration screen (25 μM) with 107 RAS complexes.** Only compounds with assembly yield (purity) greater than 70% and cell viability lesser than 50% in HCT116 were chosen for the screen.

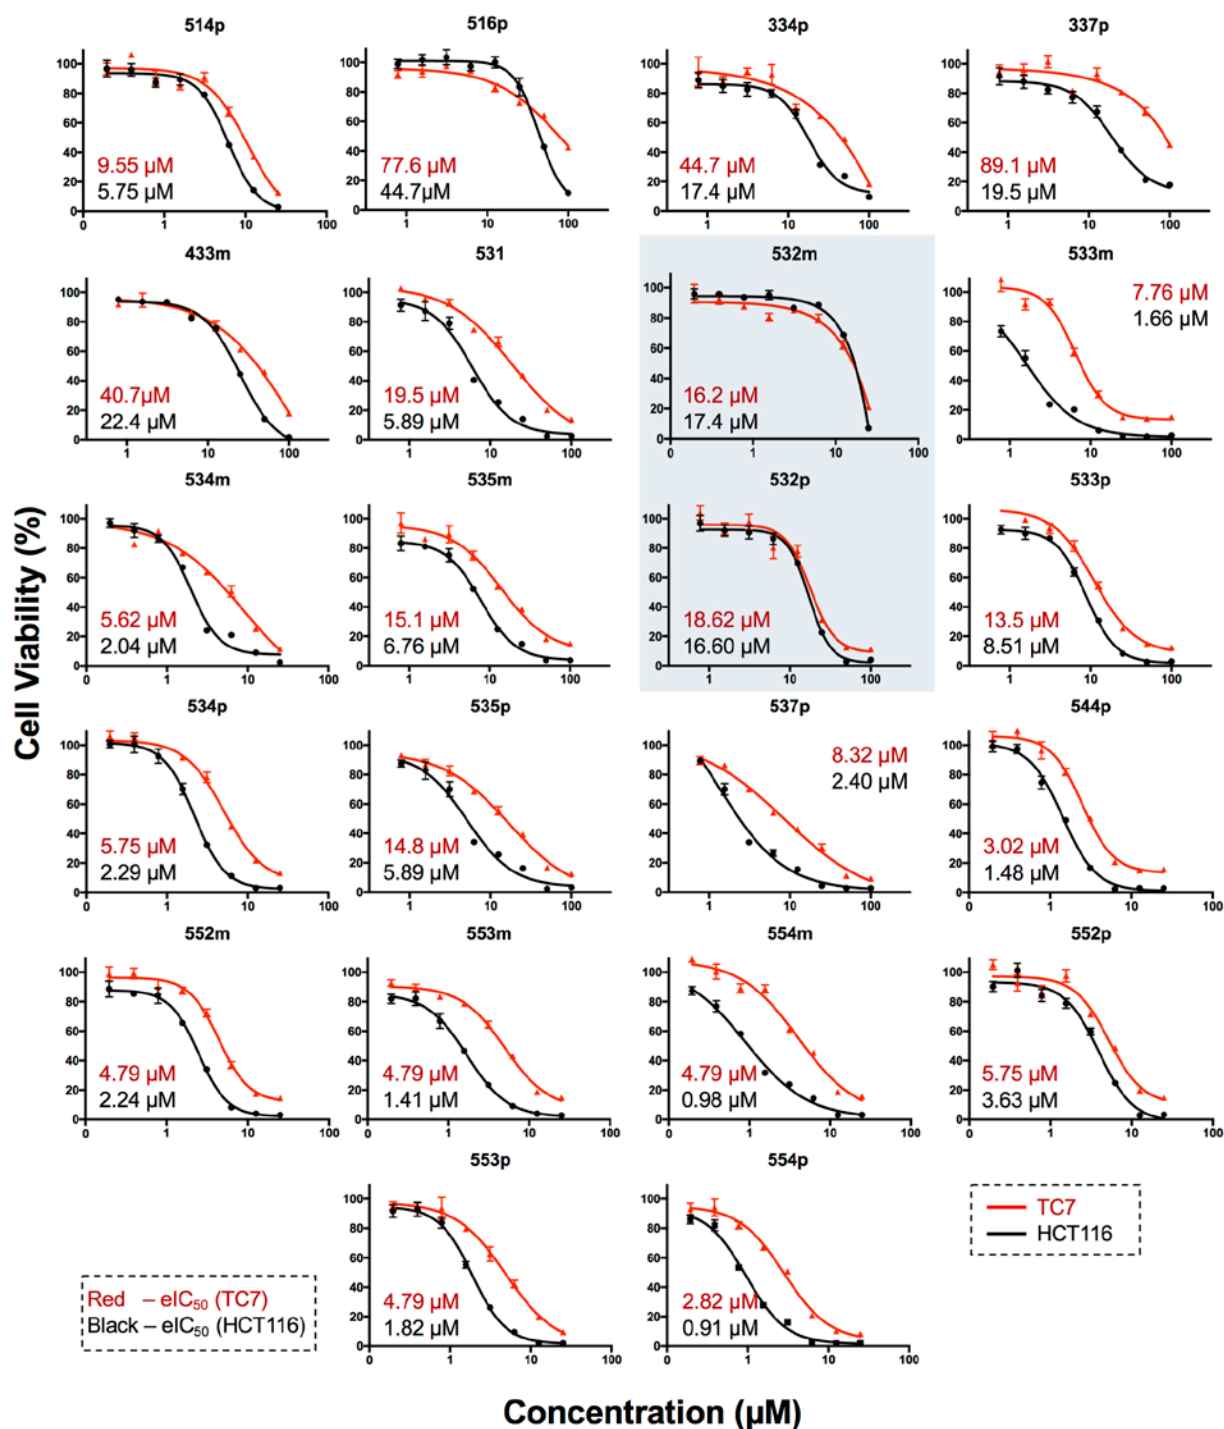

**Figure S5. Cell viability curves from secondary screening.** 22 initial hits from the single-concentration screens were tested at a range of concentrations in both HCT116 (apoptosis-sensitive) and TC7 (apoptosis-resistant) to obtain their cell viability curves. The estimated  $\text{IC}_{50}$  values from one set of experiments was used to identify the two apoptosis-independent lead compound, **532m** and **532p**.

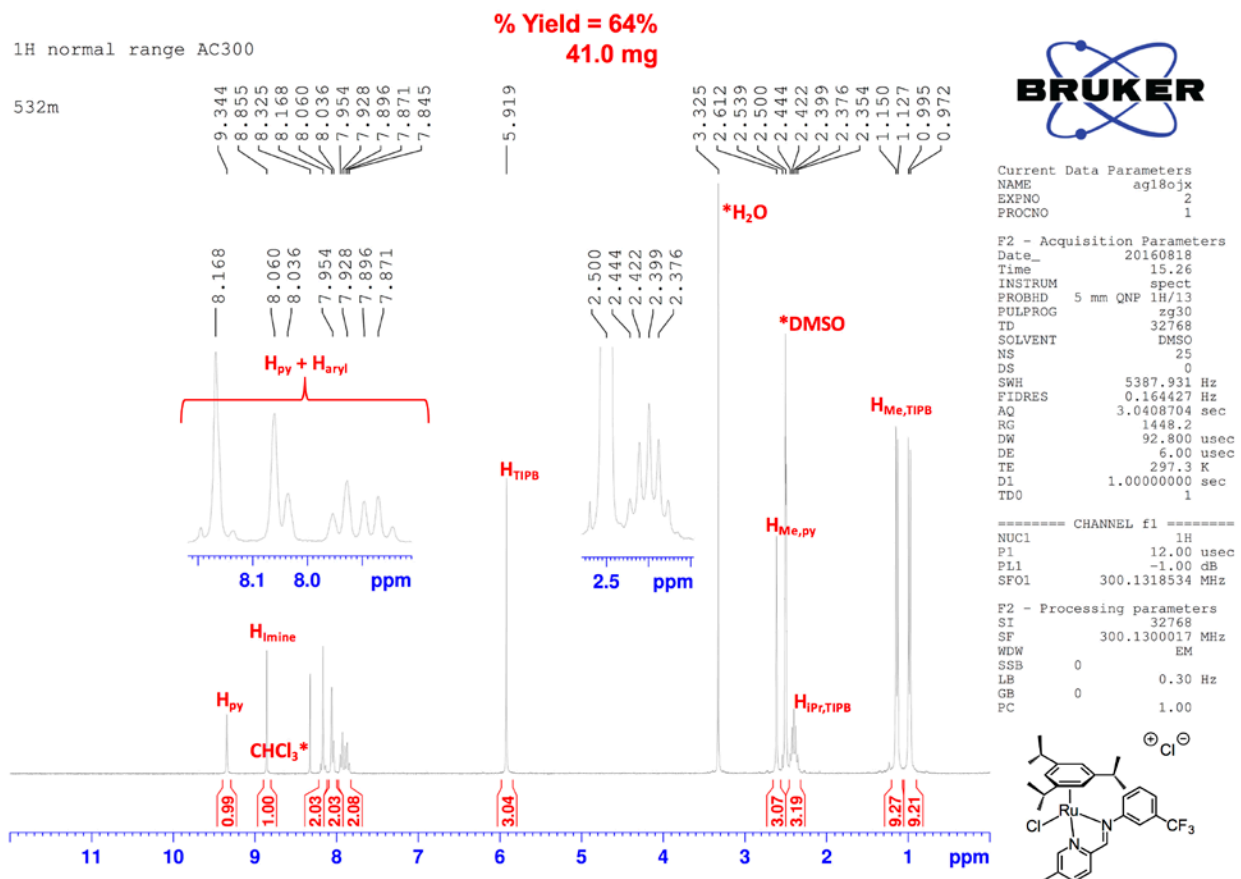

**Figure S6.**  $^1\text{H}$  NMR spectrum of 532m. Spectrum was acquired using a 300 MHz spectrometer in DMSO- $d_6$ . The formation of the imine peak around 9.0 ppm is indicative of the formation of the complex. Residual solvent peaks are as indicated.

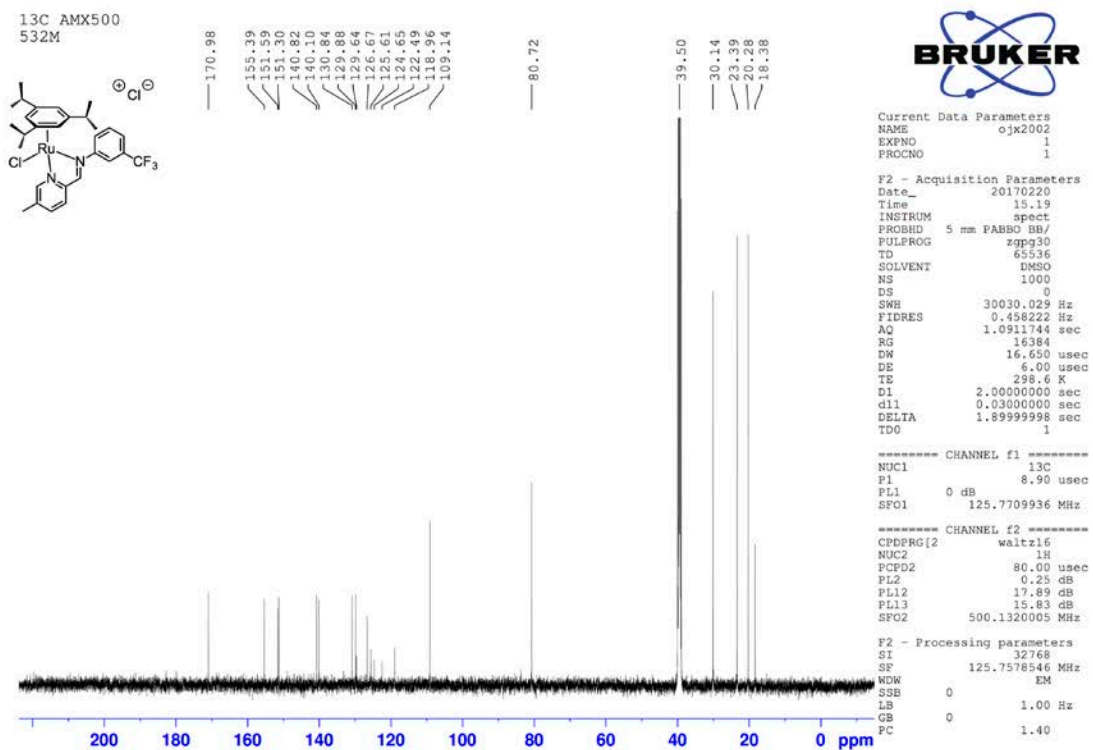

**Figure S7.**  $^{13}\text{C}$  NMR spectrum of 532m. Spectrum was acquired using a 500 MHz spectrometer in DMSO-d<sub>6</sub>.

19F Avance 400Hz  
532M

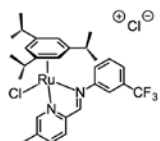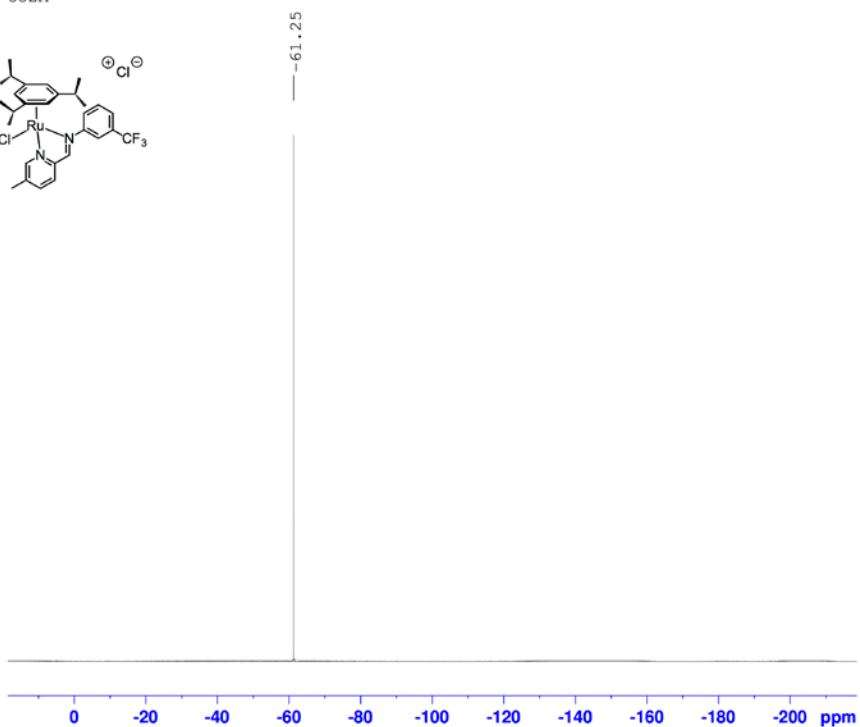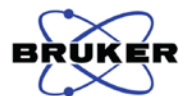

```
Current Data Parameters
NAME      Feb200jx2
EXPNO    10
PROCNO   1

F2 - Acquisition Parameters
Date_    20170220
Time     16.14
INSTRUM  spect
PROBHD   5 mm PABBO BB-
PULPROG  zgpg30
TD       131072
SOLVENT  DMSO
NS       30
DS       4
SWH      89285.711 Hz
FIDRES   0.681196 Hz
AQ       0.7340032 sec
RG       194.02
EM       5.600 usec
DE       6.50 usec
TE       298.8 K
D1       1.00000000 sec
D11      0.03000000 sec
D12      0.00002000 sec
TD0      1

===== CHANNEL f1 =====
SFO1    376.4607164 MHz
NUC1     19F
P1      13.40 usec
PLW1    24.00000000 W

===== CHANNEL f2 =====
SFO2    400.1316005 MHz
NUC2     1H
CPDPRG2 waltz16
PCPD2   80.00 usec
PLW2    17.20000076 W
PLW12   0.48256999 W

F2 - Processing parameters
SI      65536
SF      376.4983660 MHz
WDW     EM
SSB     0
LB      0.30 Hz
GB      0
PC      1.00
```

**Figure S8.**  $^{19}\text{F}$  NMR spectrum of 532m. Spectrum was acquired using a 400 MHz spectrometer in DMSO-d<sub>6</sub>.

532m #8-11 RT: 0.12-0.16 AV: 4 NL: 4.15E7  
T: + c ESI Full ms [200.00-1000.00]

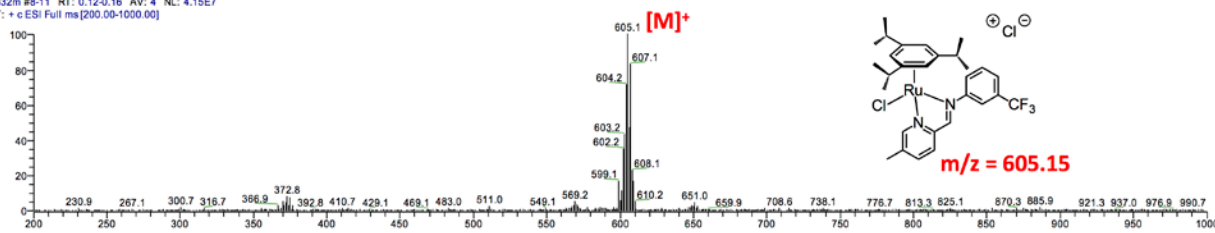

532m #83-90 RT: 1.10-1.23 AV: 8 NL: 3.54E8  
T: + c ESI Full ms2 605.00@cid34.00 [200.00-1000.00]

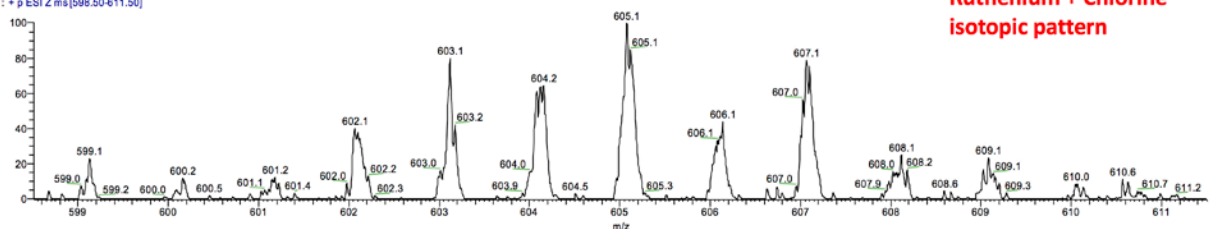

532m #83-90 RT: 1.10-1.23 AV: 8 NL: 3.54E8  
T: + c ESI Full ms2 605.00@cid34.00 [200.00-1000.00]

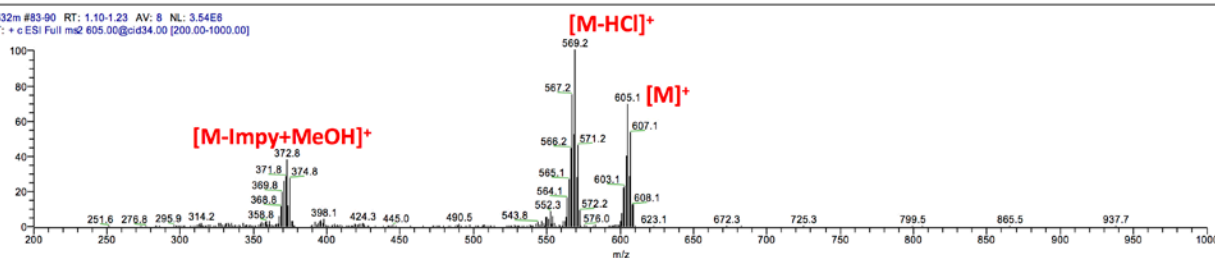

**Figure S9. ESI-MS spectrum of 532m.** (Top panel) Full MS spectrum; (Middle panel) Zoom Scan of molecular ion peak. Ruthenium and chloride isotope pattern is observed; (Bottom panel) Tandem MS-MS spectrum. Expected fragmentation pattern was observed.

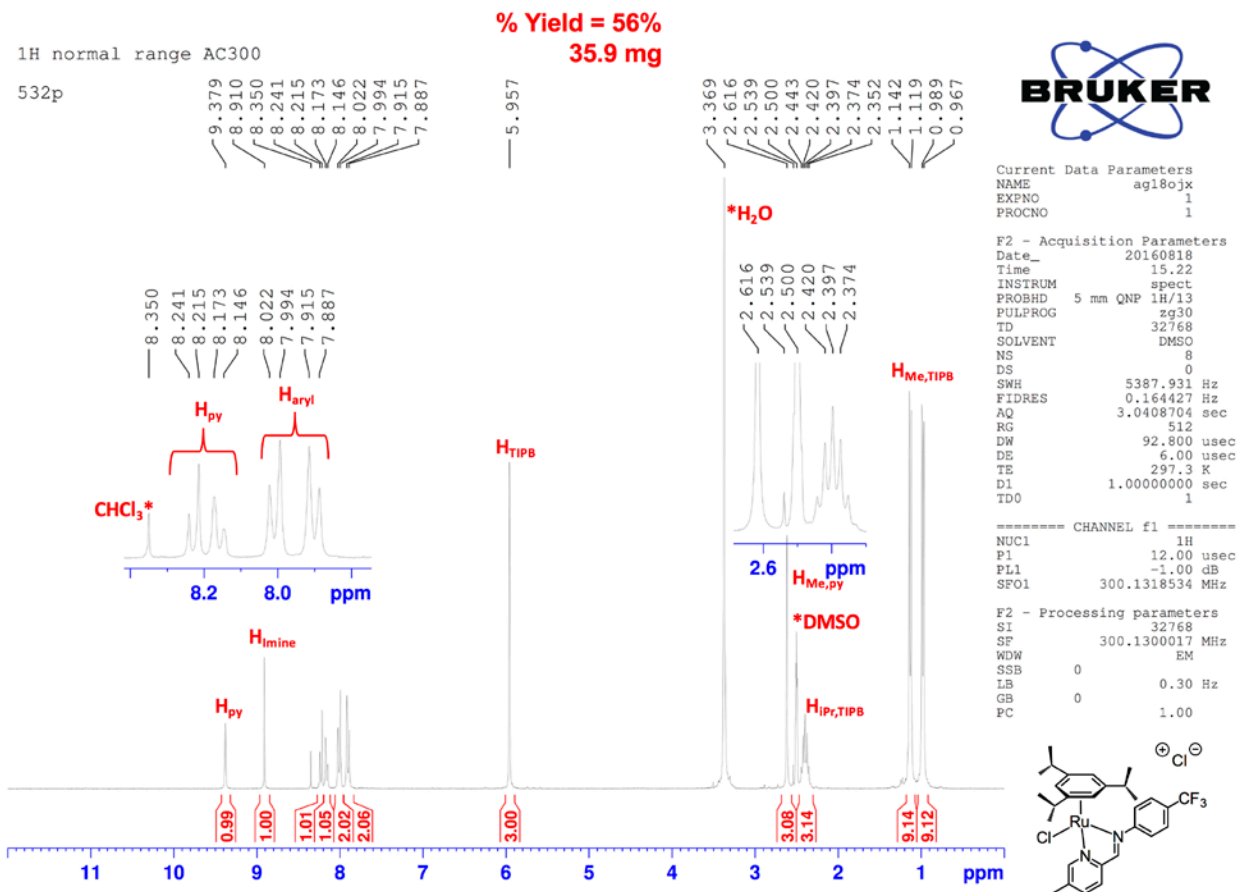

**Figure S10.**  $^1\text{H}$  NMR spectrum of 532p. Spectrum was acquired using a 300 MHz spectrometer in DMSO- $d_6$ . The formation of the imine peak around 9.0 ppm is indicative of the formation of the complex. Residual solvent peaks are as indicated.

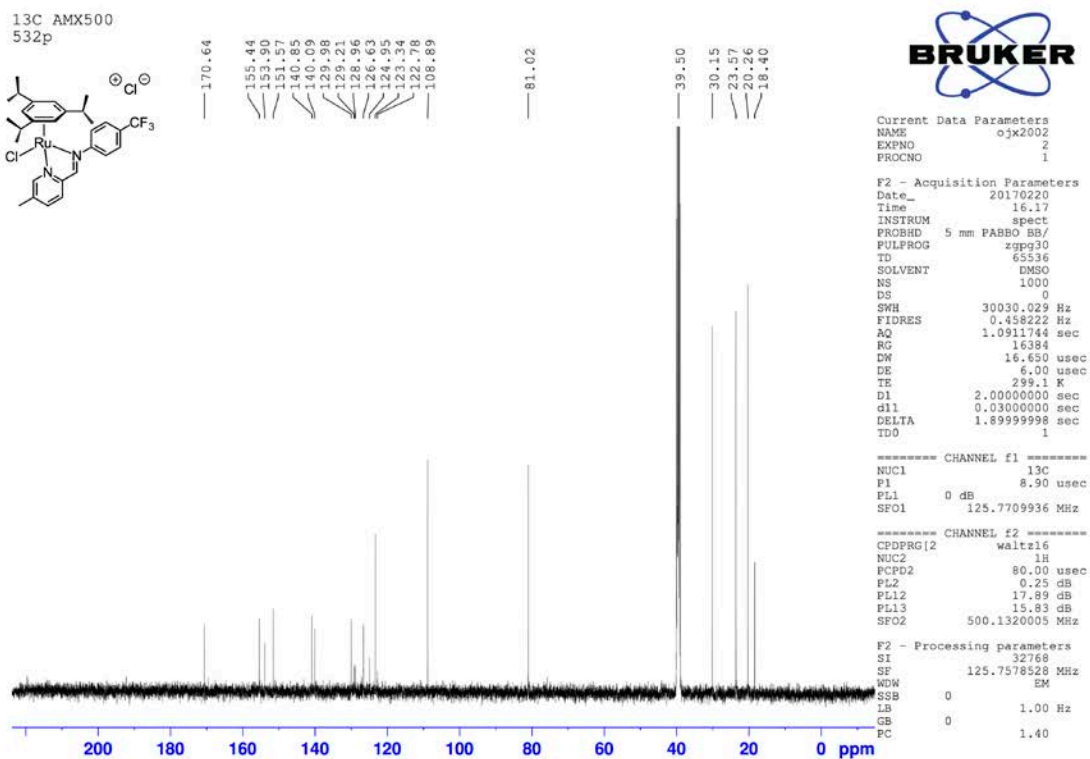

**Figure S11.**  $^{13}\text{C}$  NMR spectrum of 532p. Spectrum was acquired using a 500 MHz spectrometer in DMSO-d<sub>6</sub>.



19F Avance 400Hz  
532P

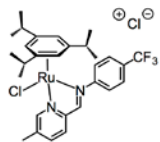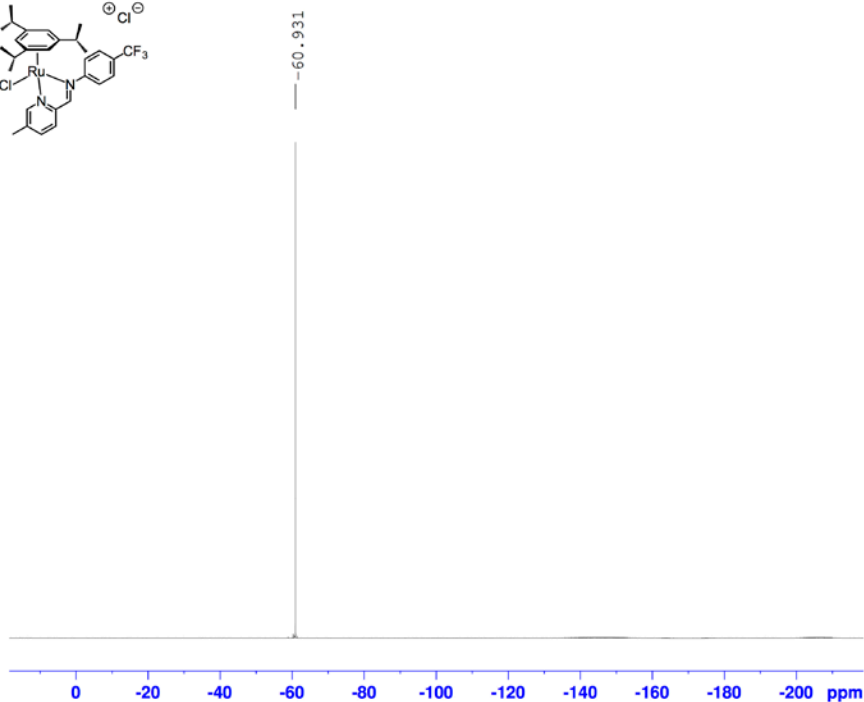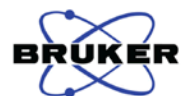

```
Current Data Parameters
NAME      Feb20o1x
EXPNO    10
PROCNO   1

F2 - Acquisition Parameters
Date_    20170220
Time     15.18
INSTRUM  spect
PROBHD   5 mm PABBO BB-
PULPROG  zgfhigqn.2
TD       131072
SOLVENT  DMSO
NS       50
DS       4
SWH      89285.711 Hz
FIDRES   0.681196 Hz
AQ       0.7340032 sec
RG       194.02
DW       5.600 usec
DE       6.50 usec
TE       298.7 K
D1       1.00000000 sec
D11      0.03000000 sec
D12      0.00002000 sec
TD0      1

===== CHANNEL f1 =====
SF01     376.4607164 MHz
NUC1     19F
P1       13.40 usec
PLW1     24.00000000 W

===== CHANNEL f2 =====
SF02     400.1316005 MHz
NUC2     1H
CPDPRG2  waltz16
PCPD2    80.00 usec
PLW2     17.20000076 W
PLW12    0.48256999 W

F2 - Processing parameters
SI       65536
SF       376.4983660 MHz
WDW      EM
SSB      0
LB       0.30 Hz
GB       0
PC       1.00
```

**Figure S12.**  $^{19}\text{F}$  NMR spectrum of 532p. Spectrum was acquired using a 500 MHz spectrometer in DMSO-d<sub>6</sub>.

532p #11-18 RT: 0.17-0.28 AV: 8 NL: 2.46E7  
T: + c ESI Full ms[200.00-1000.00]

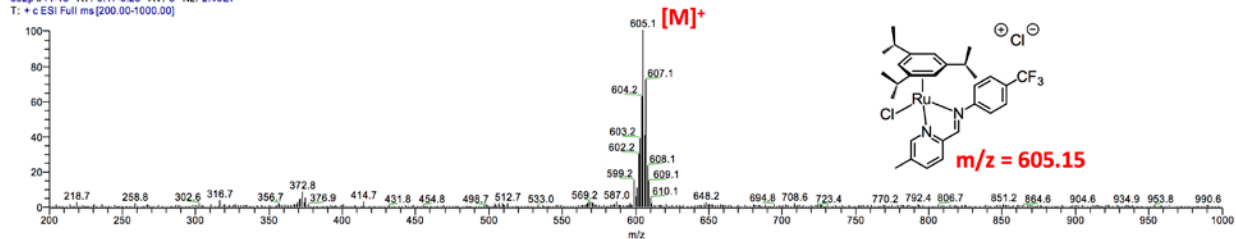

532p #30-38 RT: 0.44-0.53 AV: 9 NL: 1.58E6  
T: + p ESI Z ms[598.50-611.50]

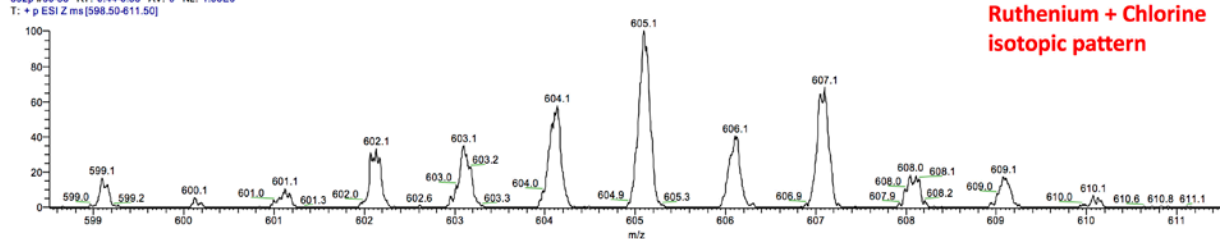

532p #48-50 RT: 0.69-0.72 AV: 3 NL: 1.96E7  
T: + c ESI Full ms2 605.00@ci434.00 [200.00-1000.00]

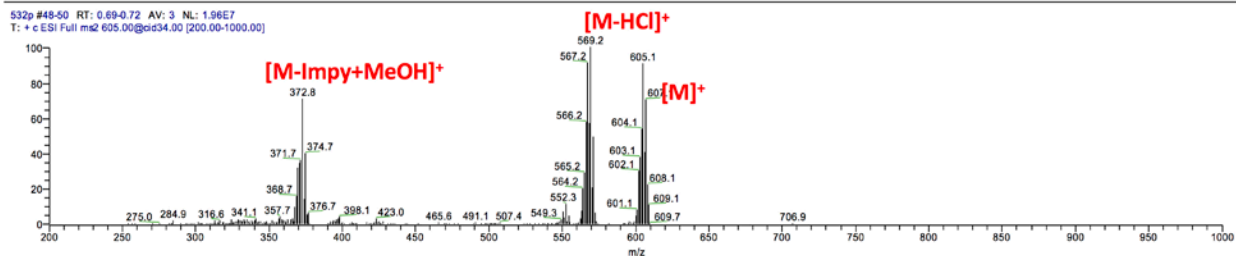

**Figure S13. ESI-MS spectrum of 532p.** (Top panel) Full MS spectrum; (Middle panel) Zoom Scan of molecular ion peak. Ruthenium and chloride isotope pattern is observed; (Bottom panel) Tandem MS-MS spectrum. Expected fragmentation pattern was observed.

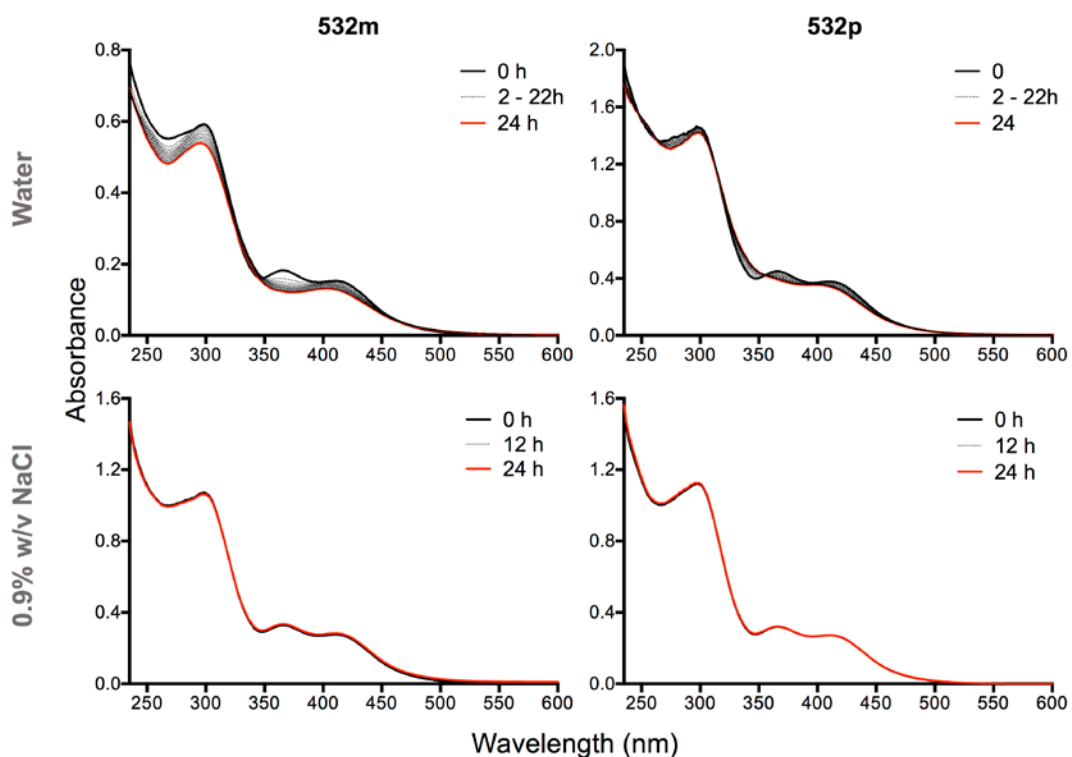

**Figure S14. Stability studies of 532m and 532p.** The UV-vis profile of the two lead compounds were monitored over 24 h in water and 0.9% w/v NaCl. (Top panels) Shifts in UV-vis profile of both compounds, with the formation of multiple isosbestic points, were observed in water; (Bottom panels) No shift was observed in 0.9% w/v NaCl. The spectrums show that **532m** and **532p** undergo some degree of aquation in water, which could be suppressed by chloride concentration similar to that of physiological conditions.

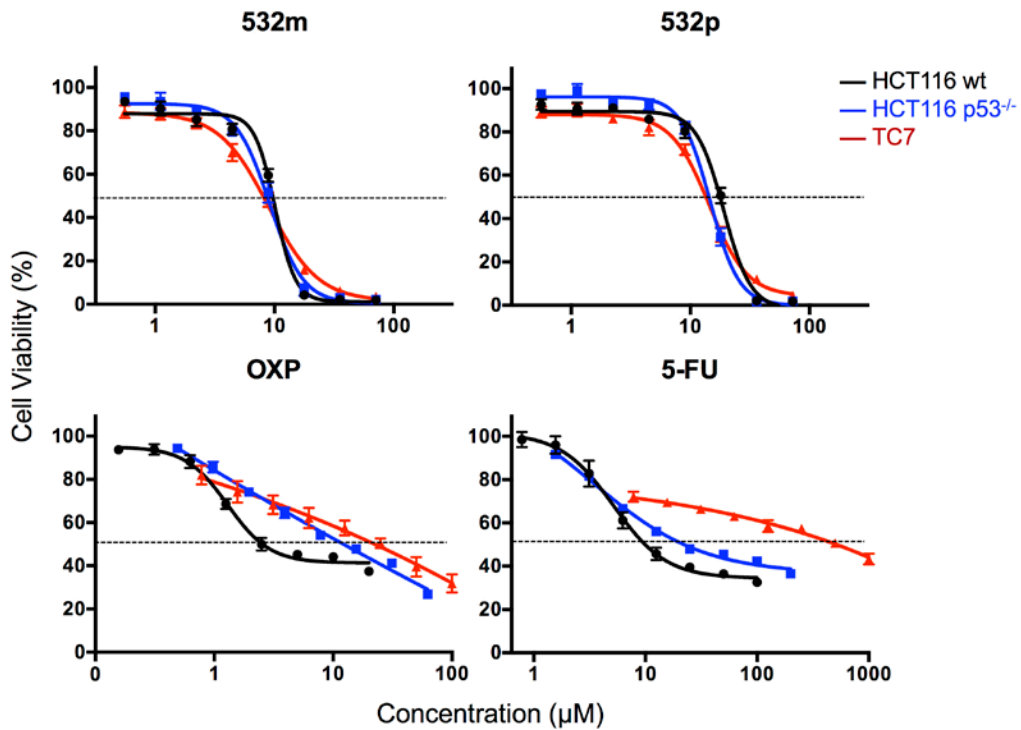

**Figure S15. Comparison of cell viability curves from three different cell line.** Each curve shown is the average of three independent experiment. **532m** and **532p** showed similar toxicity profile in all three cell lines. In contrast, oxaliplatin and 5-fluorouracil showed decreased efficacy in p53-null (HCT116 p53<sup>-/-</sup>) and apoptosis-resistant (TC7) cell lines.

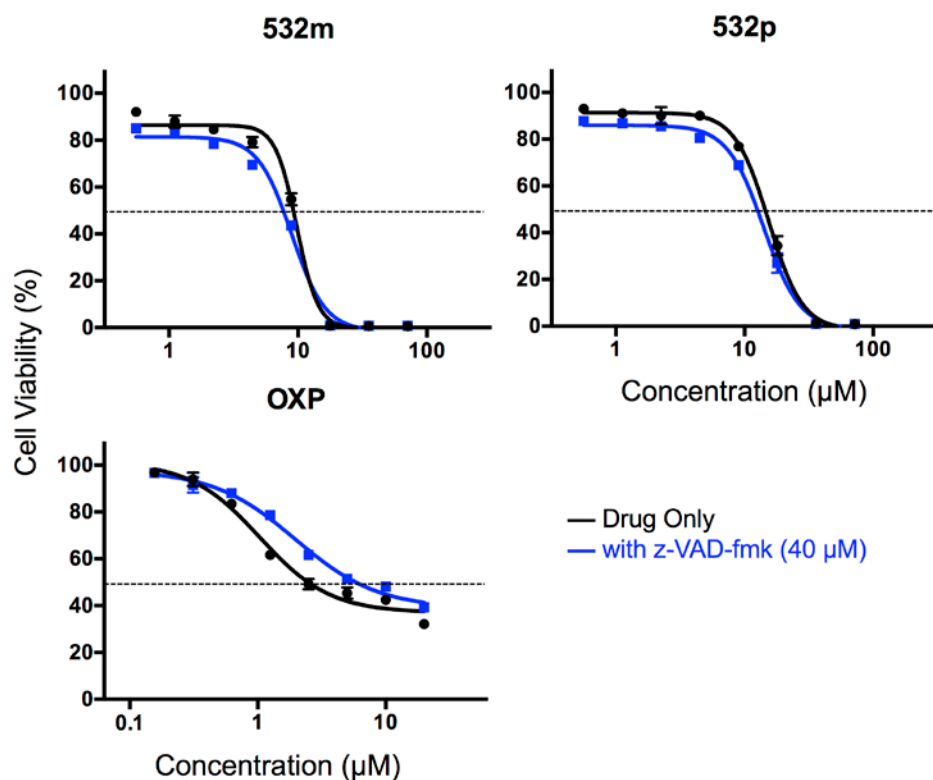

**Figure S16. Comparison of HCT116 cell viability curves with and without pan-caspase inhibitor z-VAD-fmk.** Each curve shown is the average of three independent experiment. **532m** and **532p** showed similar toxicity profile with and without z-VAD-fmk. In contrast, oxaliplatin showed decreased efficacy when co-incubated with z-VAD-fmk (with 1h pre-incubation).

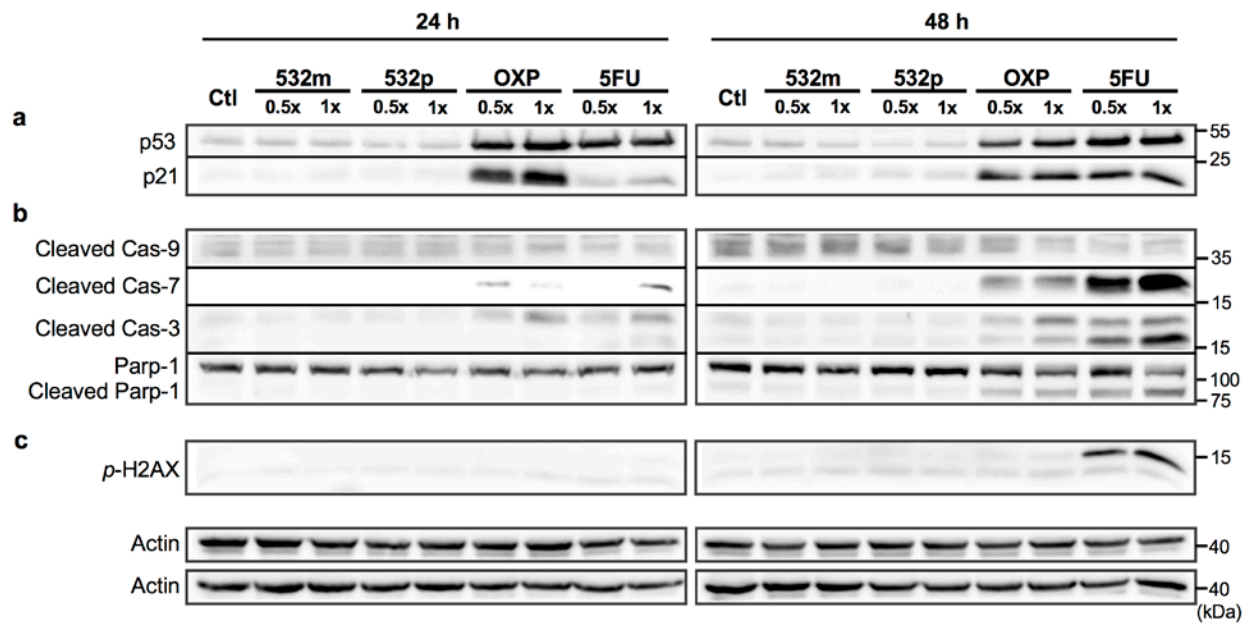

**Figure S17. Western blot analysis after treatment with 532m, 532p and positive controls.** (a) p53 and p53-target protein. (b) Apoptosis biomarkers. (c) Biomarker for DNA damage. Homogeneous protein loading determined with reference to actin.

## SUPPLEMENTARY TABLE

**Table S1.** % Assembly Yield (Purity) of each RAS complex, determined by HPLC analysis.

| % Yield |     |     |     |      |     |     |     |  |  |
|---------|-----|-----|-----|------|-----|-----|-----|--|--|
| PA1     | RA3 | RA4 | RA5 |      | RA3 | RA4 | RA5 |  |  |
| AD1     | 95  | 93  | 93  |      |     |     |     |  |  |
| AD2m    | 90  | 92  | 81  | AD2p | 92  | 90  | 78  |  |  |
| AD3m    | 92  | 92  | 87  | AD3p | 95  | 95  | 89  |  |  |
| AD4m    | 82  | 87  | 65  | AD4p | 94  | 94  | 89  |  |  |
| AD5m    | 93  | 89  | 87  | AD5p | 94  | 93  | 91  |  |  |
| AD6m    | 77  | 82  | 47  | AD6p | 98  | 93  | 92  |  |  |
| AD7m    | 64  | 74  | 63  | AD7p | 93  | 95  | 88  |  |  |
| PA2     | RA3 | RA4 | RA5 |      | RA3 | RA4 | RA5 |  |  |
| AD1     | 93  | 92  | 87  |      |     |     |     |  |  |
| AD2m    | 90  | 94  | 80  | AD2p | 88  | 87  | 74  |  |  |
| AD3m    | 93  | 90  | 86  | AD3p | 94  | 95  | 84  |  |  |
| AD4m    | 83  | 89  | 63  | AD4p | 93  | 95  | 84  |  |  |
| AD5m    | 89  | 87  | 79  | AD5p | 91  | 89  | 83  |  |  |
| AD6m    | 46  | 60  | -   | AD6p | 92  | 91  | 85  |  |  |
| AD7m    | 72  | 76  | 62  | AD7p | 93  | 94  | 84  |  |  |
| PA3     | RA3 | RA4 | RA5 |      | RA3 | RA4 | RA5 |  |  |
| AD1     | 93  | 94  | 91  |      |     |     |     |  |  |
| AD2m    | 93  | 96  | 87  | AD2p | 85  | 94  | 84  |  |  |
| AD3m    | 96  | 93  | 88  | AD3p | 93  | 97  | 81  |  |  |
| AD4m    | 81  | 91  | 71  | AD4p | 94  | 95  | 85  |  |  |
| AD5m    | 91  | 90  | 87  | AD5p | 94  | 97  | 89  |  |  |
| AD6m    | 82  | 84  | 58  | AD6p | 93  | 95  | 89  |  |  |
| AD7m    | 66  | 74  | 54  | AD7p | 96  | 98  | 82  |  |  |
| PA4     | RA3 | RA4 | RA5 |      | RA3 | RA4 | RA5 |  |  |
| AD1     | 83  | 81  | 80  |      |     |     |     |  |  |
| AD2m    | 75  | 82  | 77  | AD2p | 66  | 56  | 70  |  |  |
| AD3m    | 77  | 77  | 80  | AD3p | 83  | 79  | 72  |  |  |
| AD4m    | 55  | 70  | 57  | AD4p | 79  | 76  | 75  |  |  |
| AD5m    | 68  | 56  | 61  | AD5p | 78  | 84  | 75  |  |  |
| AD6m    | 45  | 44  | 32  | AD6p | 79  | 80  | 68  |  |  |
| AD7m    | -   | -   | -   | AD7p | 71  | 74  | 61  |  |  |
| PA5     | RA3 | RA4 | RA5 |      | RA3 | RA4 | RA5 |  |  |
| AD1     | 94  | 96  | 90  |      |     |     |     |  |  |
| AD2m    | 91  | 95  | 86  | AD2p | 89  | 79  | 89  |  |  |
| AD3m    | 92  | 94  | 92  | AD3p | 88  | 96  | 86  |  |  |
| AD4m    | 73  | 82  | 75  | AD4p | 92  | 94  | 83  |  |  |
| AD5m    | 91  | 93  | 87  | AD5p | 96  | 95  | 88  |  |  |
| AD6m    | 74  | 87  | 59  | AD6p | 90  | 93  | 89  |  |  |
| AD7m    | 69  | 82  | 75  | AD7p | 89  | 93  | 81  |  |  |

  

|       | %     | Number | %   | %   |
|-------|-------|--------|-----|-----|
| > 70  | >90   | 76     | 39  | 85  |
|       | 70-89 | 90     | 46  |     |
| <70   | 50-69 | 20     | 10  |     |
|       | <50   | 9      | 5   | 15  |
| Total |       | 195    | 100 | 100 |

**Table S2.** HCT116 cell viability data after single-concentration (25  $\mu$ M) screen with 166 RAS complexes of sufficient purity.

| % CV |  | HCT116 |     |     |      |     |     |     |  |  |  |
|------|--|--------|-----|-----|------|-----|-----|-----|--|--|--|
| PA1  |  | RA3    | RA4 | RA5 |      | RA3 | RA4 | RA5 |  |  |  |
| AD1  |  | 72     | 62  | 17  | AD2p | 72  | 68  | 27  |  |  |  |
| AD2m |  | 76     | 66  | 33  | AD3p | 68  | 55  | 11  |  |  |  |
| AD3m |  | 68     | 51  | 16  | AD4p | 62  | 13  | 2   |  |  |  |
| AD4m |  | 61     | 13  |     | AD5p | 71  | 63  | 11  |  |  |  |
| AD5m |  | 72     | 62  | 15  | AD6p | 69  | 71  | 44  |  |  |  |
| AD6m |  | 76     | 64  |     | AD7p | 60  | 28  | 3   |  |  |  |
| AD7m |  |        | 44  |     |      |     |     |     |  |  |  |
| PA2  |  | RA3    | RA4 | RA5 |      | RA3 | RA4 | RA5 |  |  |  |
| AD1  |  | 80     | 62  | 6   | AD2p | 66  | 44  | 4   |  |  |  |
| AD2m |  | 71     | 25  | 2   | AD3p | 68  | 31  | 3   |  |  |  |
| AD3m |  | 68     | 29  | 0   | AD4p | 24  | 15  | 2   |  |  |  |
| AD4m |  | 37     | 7   |     | AD5p | 67  | 51  | 12  |  |  |  |
| AD5m |  | 66     | 46  | 8   | AD6p | 73  | 78  | 33  |  |  |  |
| AD6m |  |        |     |     | AD7p | 39  | 24  | 9   |  |  |  |
| AD7m |  | 60     | 32  |     |      |     |     |     |  |  |  |
| PA3  |  | RA3    | RA4 | RA5 |      | RA3 | RA4 | RA5 |  |  |  |
| AD1  |  | 90     | 57  | 21  | AD2p | 80  | 58  | 30  |  |  |  |
| AD2m |  | 90     | 45  | 8   | AD3p | 75  | 37  | 11  |  |  |  |
| AD3m |  | 81     | 47  | 12  | AD4p | 43  | 2   | 1   |  |  |  |
| AD4m |  | 60     | 1   | 1   | AD5p | 78  | 58  | 18  |  |  |  |
| AD5m |  | 76     | 56  | 17  | AD6p | 70  | 76  | 65  |  |  |  |
| AD6m |  | 79     | 73  |     | AD7p | 45  | 30  | 13  |  |  |  |
| AD7m |  |        | 36  |     |      |     |     |     |  |  |  |
| PA4  |  | RA3    | RA4 | RA5 |      | RA3 | RA4 | RA5 |  |  |  |
| AD1  |  | 57     | 19  | 3   | AD2p |     |     | 3   |  |  |  |
| AD2m |  | 65     | 3   | 3   | AD3p | 45  | 15  | 3   |  |  |  |
| AD3m |  | 65     | 2   | 2   | AD4p | 5   | 3   | 3   |  |  |  |
| AD4m |  |        | 3   |     | AD5p | 27  | 17  | 2   |  |  |  |
| AD5m |  |        |     |     | AD6p | 64  | 54  |     |  |  |  |
| AD6m |  |        |     |     | AD7p | 8   | 13  |     |  |  |  |
| AD7m |  |        |     |     |      |     |     |     |  |  |  |
| PA5  |  | RA3    | RA4 | RA5 |      | RA3 | RA4 | RA5 |  |  |  |
| AD1  |  | 34     | 29  | 3   | AD2p | 48  | 11  | 2   |  |  |  |
| AD2m |  | 26     | 2   | 3   | AD3p | 19  | 11  | 2   |  |  |  |
| AD3m |  | 26     | 3   | 3   | AD4p | 3   | 2   | 2   |  |  |  |
| AD4m |  | 7      | 2   | 2   | AD5p | 25  | 20  | 7   |  |  |  |
| AD5m |  | 24     | 18  | 2   | AD6p | 59  | 58  | 13  |  |  |  |
| AD6m |  | 75     | 64  |     | AD7p | 16  | 7   | 3   |  |  |  |
| AD7m |  |        | 11  | 3   |      |     |     |     |  |  |  |

  

|              | %     | Number | %   | %          |
|--------------|-------|--------|-----|------------|
| > 50         | >50   | 59     | 36  | 48         |
|              | 30-49 | 21     | 13  |            |
| < 50         | 10-29 | 39     | 23  | 52         |
|              | <10   | 47     | 28  |            |
| <b>Total</b> |       | 166    | 100 | <b>100</b> |
